# Supplementary material for: Influence of halogen atoms on the structures and photophysical properties of 9,10-distyrylanthracene (DSA)
Source: Royal Society of Chemistry journal article supplement (doi:10.1039/c5ce01465d), 2015-01-01
Supplement: c5ce01465d1.pdf [file c5ce01465d1.pdf]

## Supporting Information

# Influence of Halogen Atoms on Structures and Photophysical Properties of 9,10-distyrylanthracene(DSA)

Dong-En Wu, Man-Ning Wang, Yang-Hui Luo, Gao-Ju Wen and Bai-Wang Sun\*

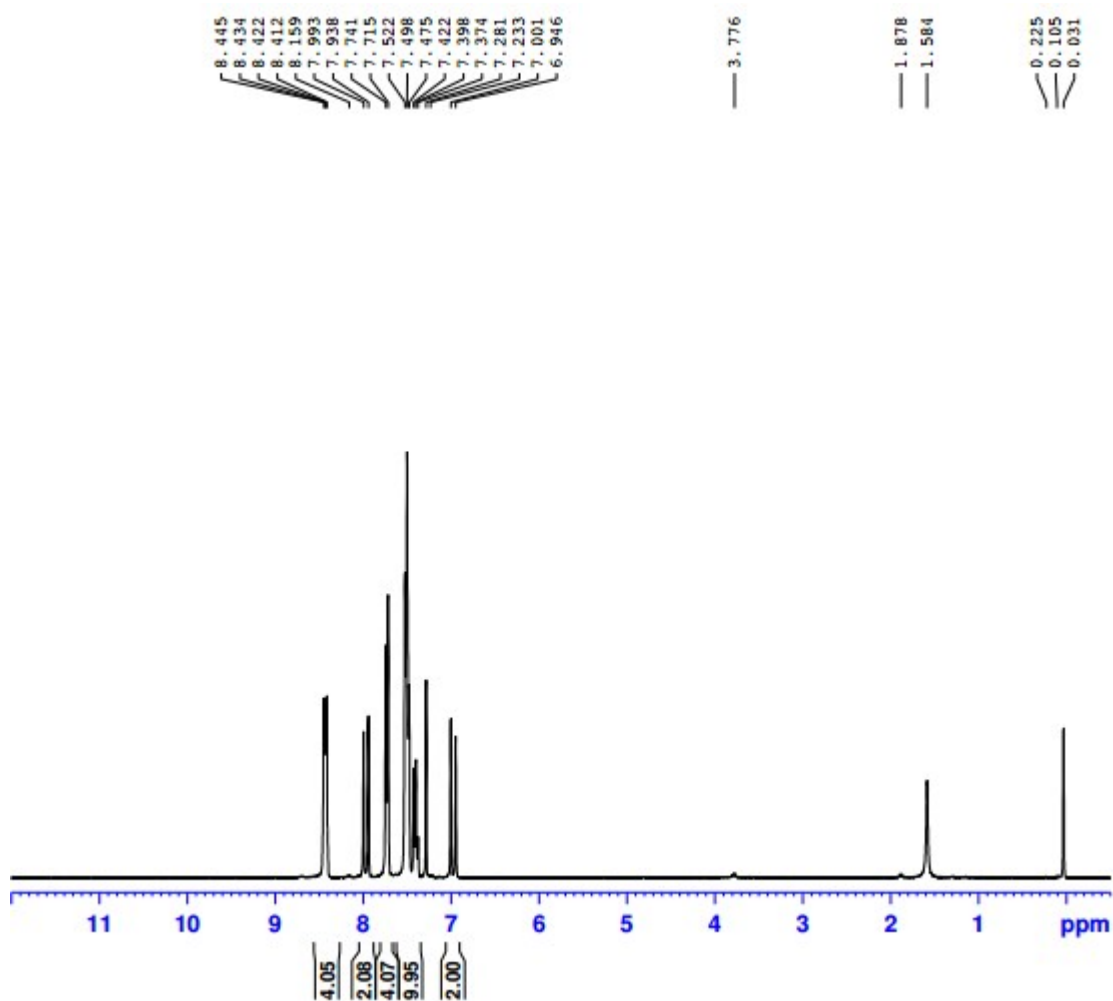

**Fig 1S.** <sup>1</sup>H-NMR spectra of 9,10-Distyrylanthracene (DSA).

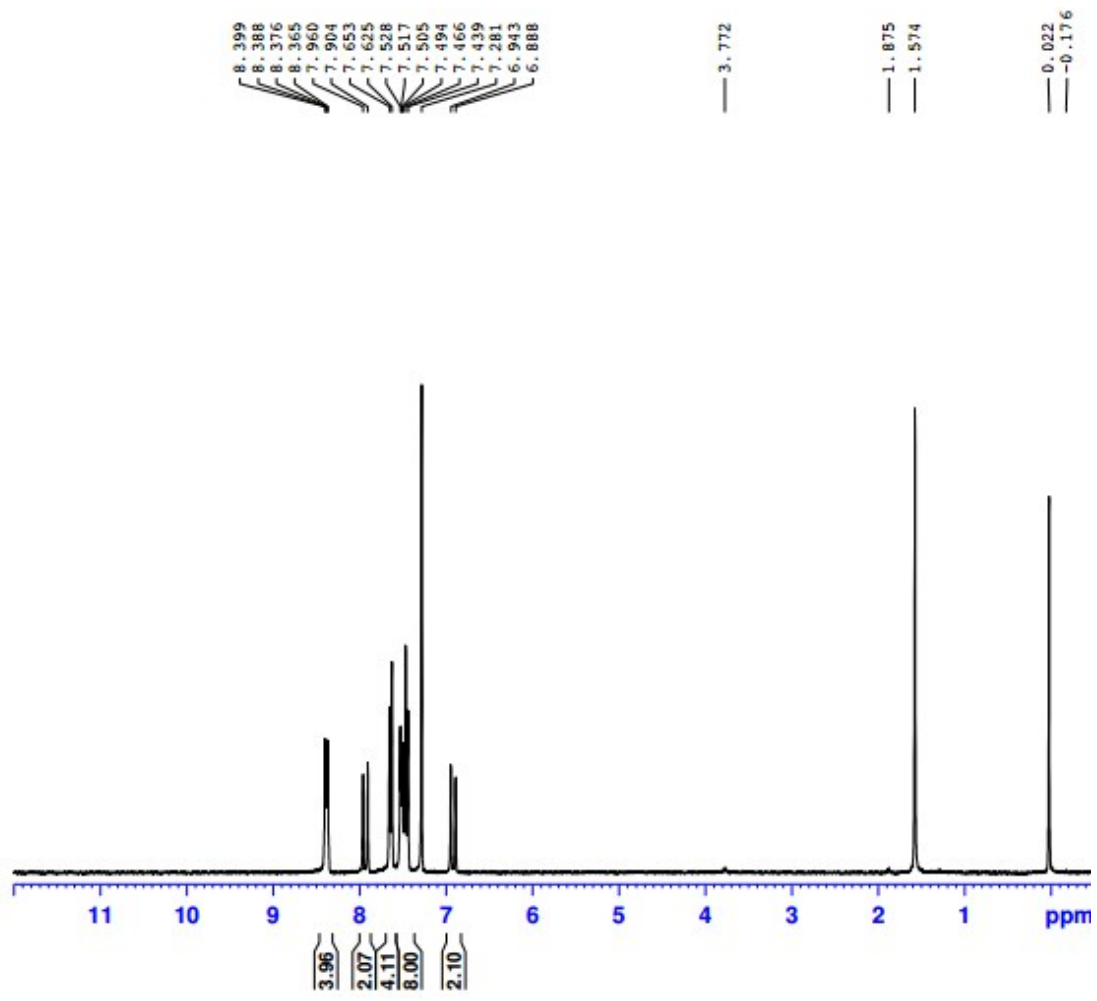

**Fig 2S.**  $^1\text{H-NMR}$  spectra of 9,10-Bis(4-fluorostyryl)anthracene (BFSA).

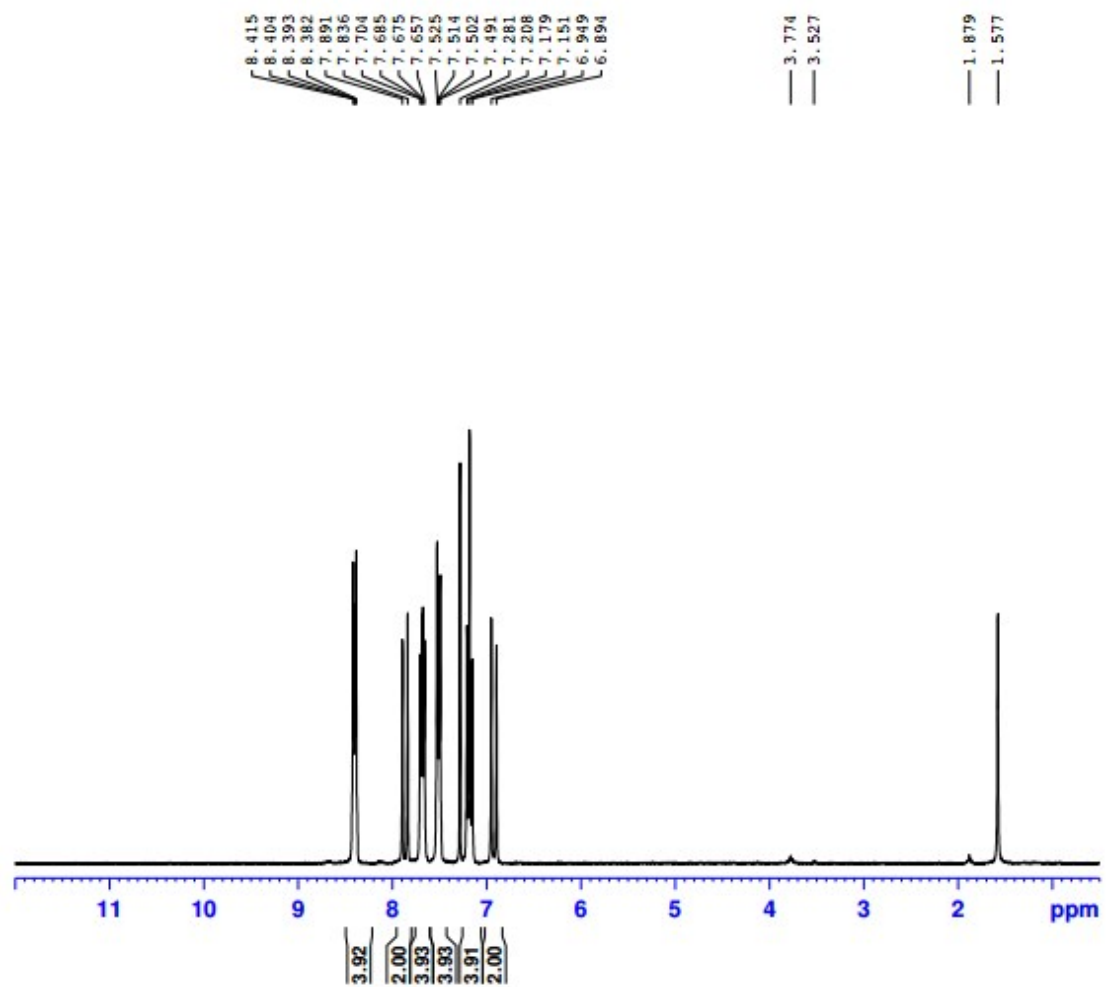

**Fig 3S.**  $^1\text{H-NMR}$  spectra of 9,10-Bis(4-chlorostyryl)anthracene (BCSA).

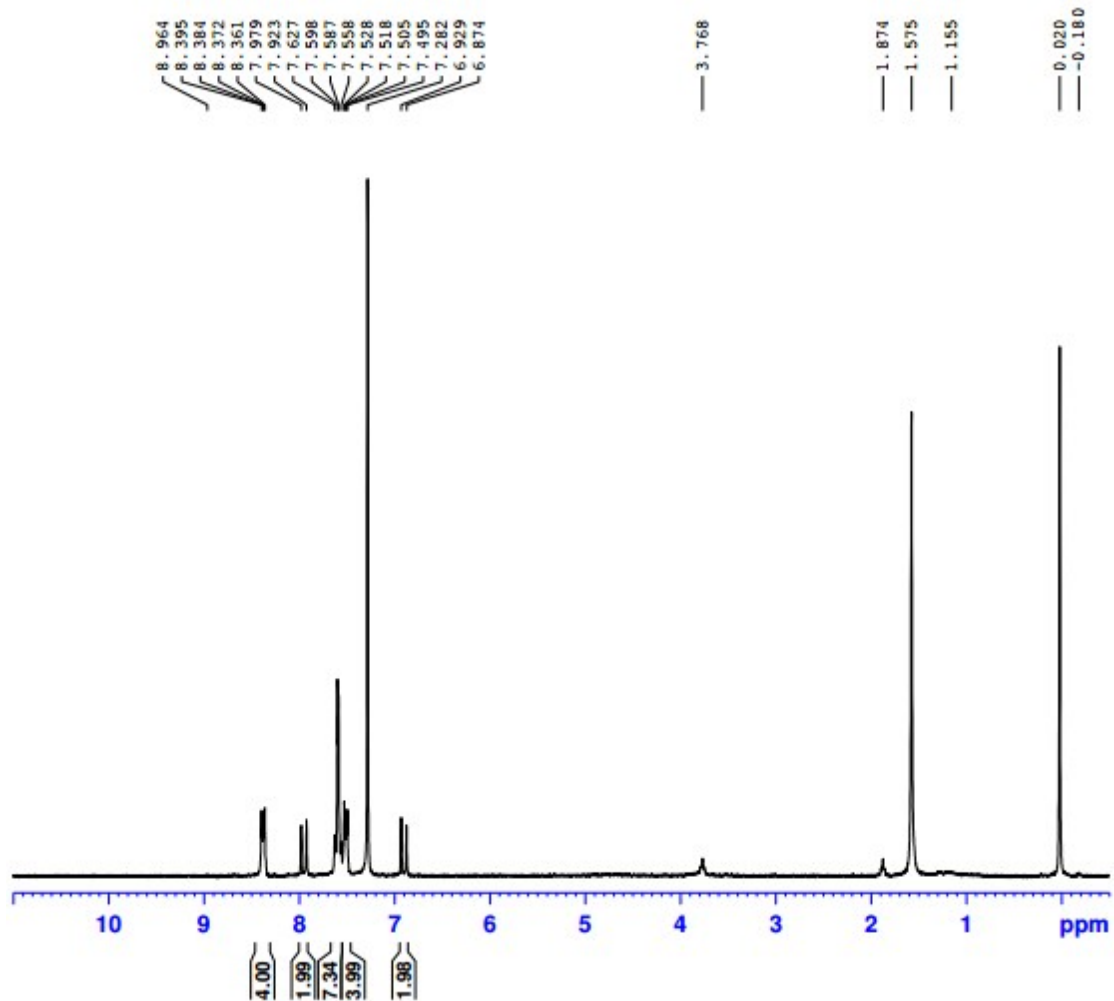

**Fig 4S.**  $^1\text{H-NMR}$  spectra of 9,10-Bis(4-bromostyryl)anthracene (BBSA).

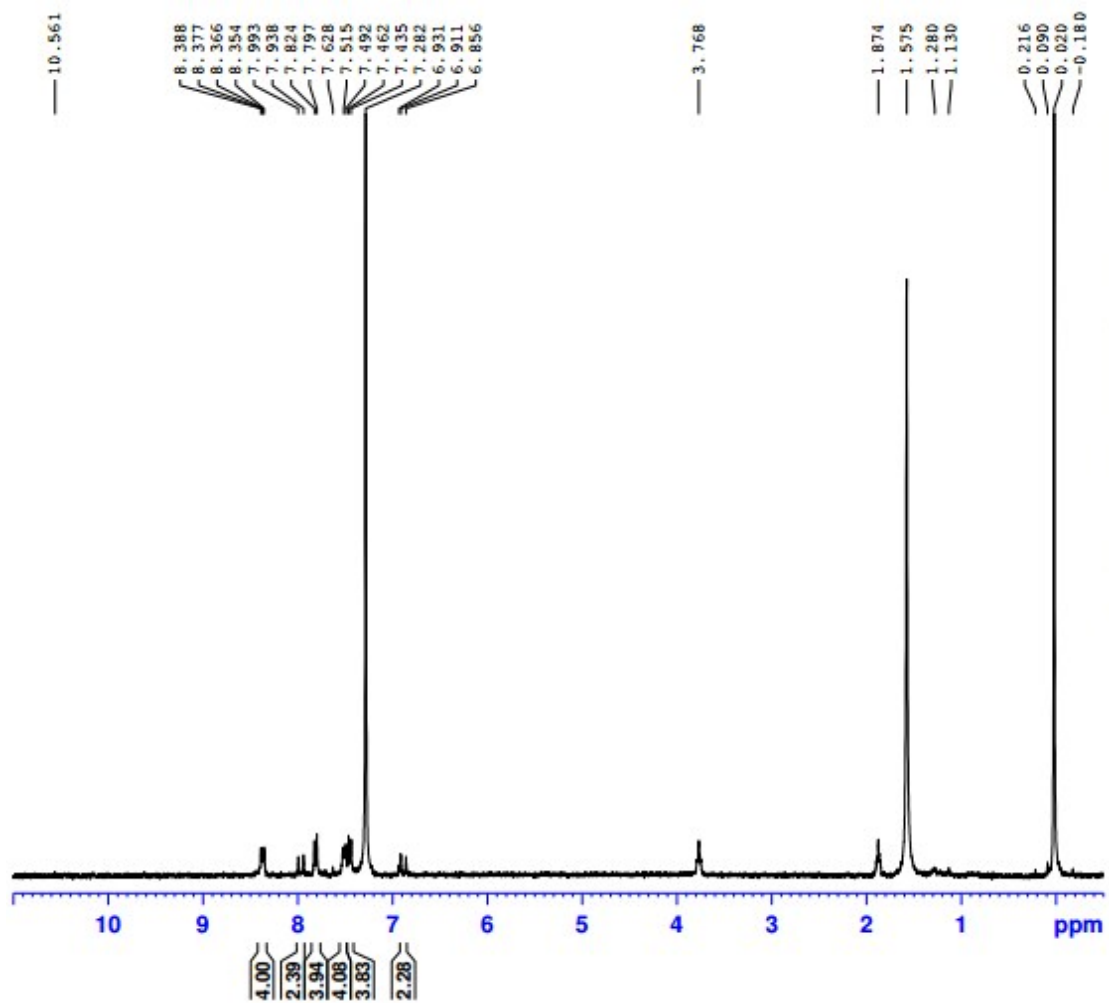

**Fig 5S.**  $^1\text{H-NMR}$  spectra of 9,10-Bis(4-iodostyryl)anthracene (BISA).

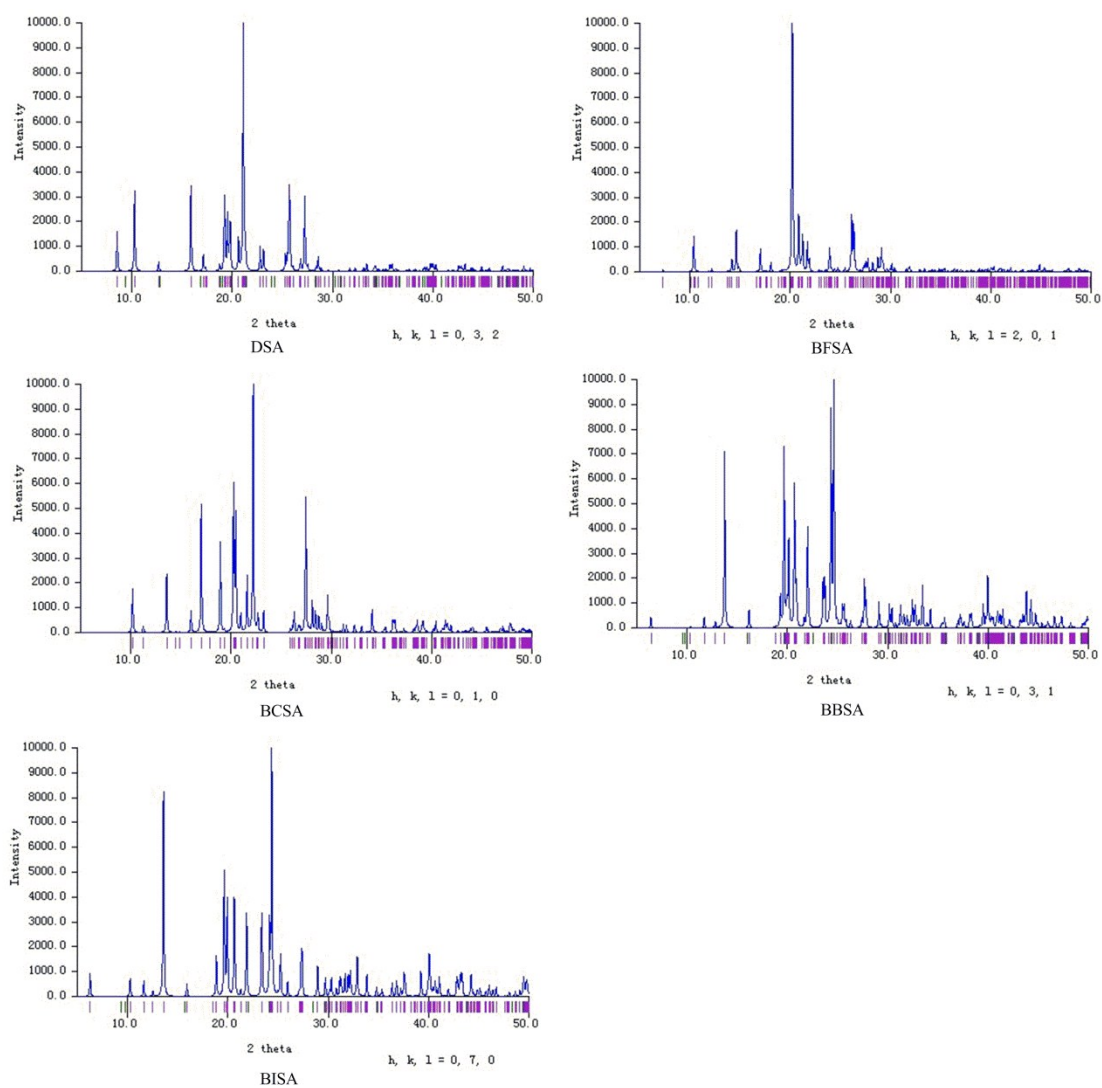

**Fig 6S.** The simulated PXD patterns of the five crystals.

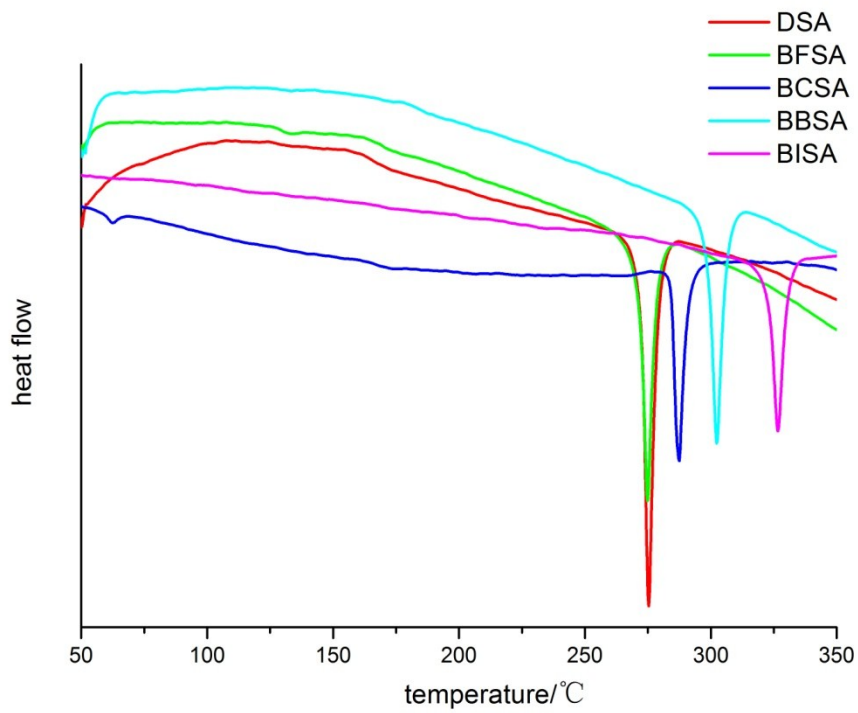

**Fig. 7S** The DSC profiles of the five crystals
